# Supplementary material
Source: PubMed Central journal article supplement (PMC6724743)
Supplement: NIHMS1047158-supplement-Appendix.pdf [file NIHMS1047158-supplement-Appendix.pdf]

## Appendix: Search Methods

### Patient Navigation MEDLINE (OVID)

\* = focus MeSH term / = MeSH term  
adj = adjacency search  
ti = title ab = abstract  
\$ = truncation

### HIV or AIDS MeSH and keywords

1. \*HIV infections/
2. \*AIDS/
3. \*HIV Seropositivity/
4. \*AIDS Serodiagnosis/
5. HIV infect\$.ti,ab
6. HIV positiv\$.ti,ab
7. HIV care.ti,ab
8. (HIV adj4 incidence).ti,ab
9. (HIV adj4 prevent\$).ti,ab
10. (HIV adj4 risk\$).ti,ab
11. (HIV adj4 prevalen\$).ti,ab
12. (HIV adj4 new\$ infect\$).ti,ab
13. (HIV adj4 new\$ diagnos\$).ti,ab
14. (HIV adj4 transm\$).ti,ab
15. (living adj4 HIV).ti,ab
16. (living adj4 (AIDS not hearing)).ti,ab
17. or/1-16

### Patient Navigation MeSH and keywords

18. Patient Navigation/
19. Navigat\$.ti,ab
20. (care adj4 coordinat\$).ti,ab
21. ((care or peer) adj4 advocat\$).ti,ab
22. (nurse adj2 guid\$).ti,ab
23. Coach.ti,ab
24. Shepherd\$.ti,ab
25. ((re-integration or re integration) adj4 specialist\$).ti,ab
26. or/18-25
27. 17 and 26

All languages, 1996 – 2018

Publication limits: Clinical Trial, Controlled Clinical Trial, Corrected and Republished Article, Evaluation Studies, Journal Article, Meta-Analysis, Multicenter Study, Published Erratum, Randomized Controlled Trial, Retraction of Publication, Review, Systematic Reviews, Validation Studies

### Patient Navigation EMBASE (OVID)

\* = focus indexing term / = indexing term  
adj = adjacency search  
ti = title ab = abstract  
\$ = truncation

### HIV or AIDS indexing and keywords

1. \*Human Immunodeficiency Virus Infection/
2. \*Acquired Immune Deficiency Syndrome/
3. \*Serodiagnosis/
4. HIV infect\$.ti,ab
5. HIV positiv\$.ti,ab
6. HIV care.ti,ab
7. (HIV adj4 incidence).ti,ab
8. (HIV adj4 prevent\$).ti,ab
9. (HIV adj4 risk\$).ti,ab
10. (HIV adj4 prevalen\$).ti,ab
11. (HIV adj4 new\$ infect\$).ti,ab
12. (HIV adj4 new\$ diagnos\$).ti,ab
13. (HIV adj4 transm\$).ti,ab
14. (living adj4 HIV).ti,ab
15. (living adj4 (AIDS not hearing)).ti,ab
16. or/1-15

### Patient Navigation indexing and keywords

17. Navigat\$.ti,ab
18. (care adj4 coordinat\$).ti,ab
19. ((care or peer) adj4 advocat\$).ti,ab
20. (nurse adj2 guid\$).ti,ab
21. Coach.ti,ab
22. Shepherd\$.ti,ab
23. ((re-integration or re integration) adj4 specialist\$).ti,ab
24. or/17-23
25. 16 and 24

All languages, 1996 – 2018

Publication limits: Article, books, chapter, erratum, reports, review

### Patient Navigation PsycINFO (OVID)

\* = focus indexing term / = indexing term  
adj = adjacency search  
ti = title ab = abstract  
\$ = truncation

#### HIV or AIDS indexing and keywords

1. \*HIV/
2. \*AIDS/
3. \*AIDS Prevention/
4. HIV infect\$.ti,ab
5. HIV positiv\$.ti,ab
6. HIV care.ti,ab
7. (HIV adj4 incidence).ti,ab
8. (HIV adj4 prevent\$).ti,ab
9. (HIV adj4 risk\$).ti,ab
10. (HIV adj4 prevalen\$).ti,ab
11. (HIV adj4 new\$ infect\$).ti,ab
12. (HIV adj4 new\$ diagnos\$).ti,ab
13. (HIV adj4 transm\$).ti,ab
14. (living adj4 HIV).ti,ab
15. (living adj4 (AIDS not hearing)).ti,ab
16. or/1-15

#### Patient Navigation indexing and keywords

17. Navigat\$.ti,ab
18. (care adj4 coordinat\$).ti,ab
19. ((care or peer) adj4 advocat\$).ti,ab
20. ((nurse adj2 guide\*).ti,ab
21. Coach.ti,ab
22. Shepherd\$.ti,ab
23. ((re-integration or re integration) adj4 specialist\$).ti,ab
24. or/17-23
25. 16 and 24

All languages, 1996 - 2018

Publication limits: Journal, Peer-Reviewed Journal, Non-Peer Reviewed Journal, Peer-Reviewed status unknown, Book, Authored Book, Edited Book

### Patient Navigation CINAHL (EBSCOhost)

MM - Major Concept (focus)  
MH - Major heading (not focused)  
TI - Title AB - Abstract  
\*-Truncation  
N# - find words *near* regardless of order

#### HIV or AIDS indexing and keywords

1. (MM "HIV Infections")
2. (MM "Acquired Immunodeficiency Syndrome")
3. (MM "HIV Seropositivity")
4. (MM "AIDS Serodiagnosis")
5. TI HIV infect\* OR AB HIV infect\*
6. TI HIV positiv\* OR AB HIV positiv\*
7. TI HIV care OR AB HIV care
8. TI HIV N4 incidence OR AB HIV N4 incidence
9. TI HIV N4 prevent\* OR AB HIV N4 prevent\*
10. TI HIV N4 risk\* OR AB HIV N4 risk\*
11. TI HIV N4 prevalen\* OR AB HIV N4 prevalen\*
12. TI HIV N4 new\* infect\* OR AB HIV N4 new\* infect\*
13. TI HIV N4 new\* diagnos\* OR AB HIV N4 new\* diagnos\*
14. TI HIV N4 transm\* OR AB HIV N4 transm\*
15. TI living N4 HIV OR AB living N4 HIV
16. TI ( living N4 (AIDS not hearing) ) OR AB ( living N4 (AIDS not hearing) )
17. or/1-16

#### Patient Navigation indexing and keywords

18. (MH "Patient Navigation")
19. TI (navigat\*) OR AB (navigat\*)
20. TI (care N4 coordinat\*) OR AB (care\* N4 coordinat\*)
21. TI (care N4 advocat\*) OR AB (care N4 advocat\*)
22. TI (peer N4 advocat\*) OR AB (peer N4 advocat\*)
23. TI (nurse N2 guid\*) OR AB (nurse N4 guid\*)
24. TI (coach) OR AB (coach)
25. TI (shepherd\*) OR AB (shepherd\*)
26. TI (re-integration N4 specialist\*) OR AB (re-integration N4 specialist\*)
27. TI (re integration N4 specialist\*) OR AB (re integration N4 specialist\*)
28. or/18-27
29. 17 and 28

All languages, 2000 – 2018
